# Supplementary material for: Spatial and temporal point tracking in real hyperspectral images
Source: Springer Nature journal article supplement (doi:10.1186/1687-6180-2011-30), 2011-07-26

Type 3 SNR=4 VarWin= 4 GroupWin= 15 Overlap= 5 DCWin= 20

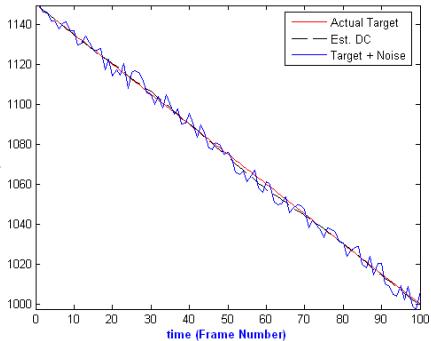

Sub Profile No1

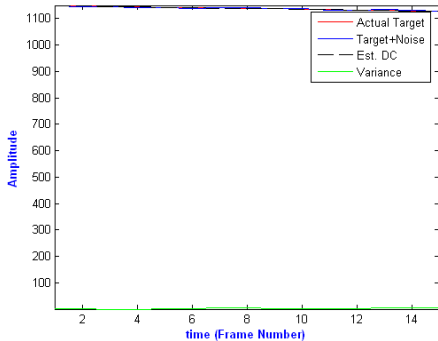

Supplement: 13634_2010_27_MOESM18_ESM.pdf [file 13634_2010_27_MOESM18_ESM.pdf]
