# Supplementary material for: Spatial and temporal point tracking in real hyperspectral images
Source: Springer Nature journal article supplement (doi:10.1186/1687-6180-2011-30), 2011-07-26

Frame 70 from IR sequence NPA

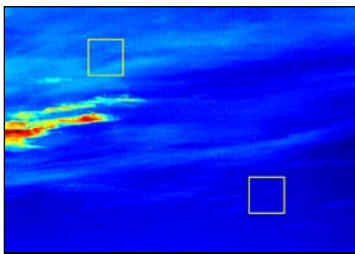

Result Image of IR sequence NPA

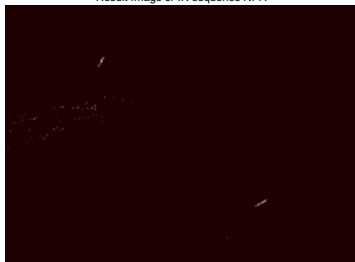

Frame 70 from IR sequence J13C

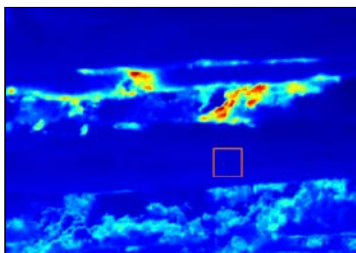

Result Image of IR sequence J13C

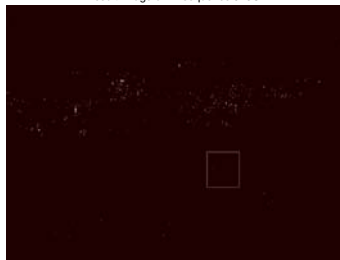

Frame 70 from IR sequence M21F

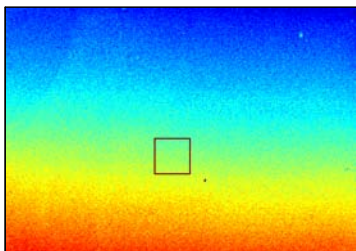

Result Image of IR sequence M21F

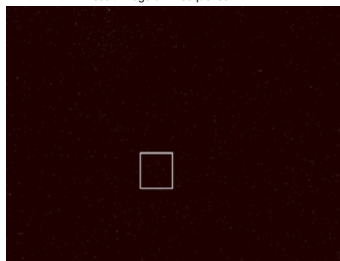

Frame 70 from IR sequence J2A

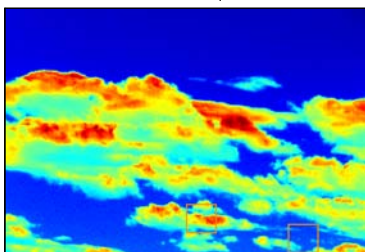

Result Image of IR sequence J2A

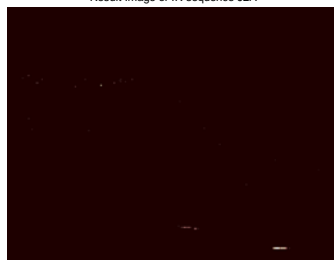

Frame 70 from IR sequence NA23

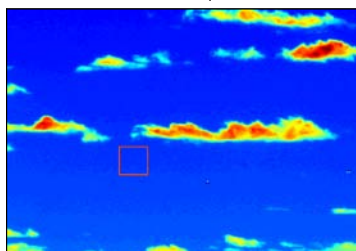

Result Image of IR sequence NA23

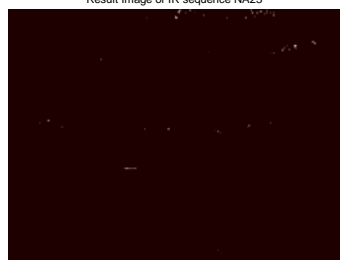

Supplement: 13634_2010_27_MOESM23_ESM.pdf [file 13634_2010_27_MOESM23_ESM.pdf]
