# Supplementary material for: Spatial and temporal point tracking in real hyperspectral images
Source: Springer Nature journal article supplement (doi:10.1186/1687-6180-2011-30), 2011-07-26

### a. Target blocks and profiles from the IR sequence NPA

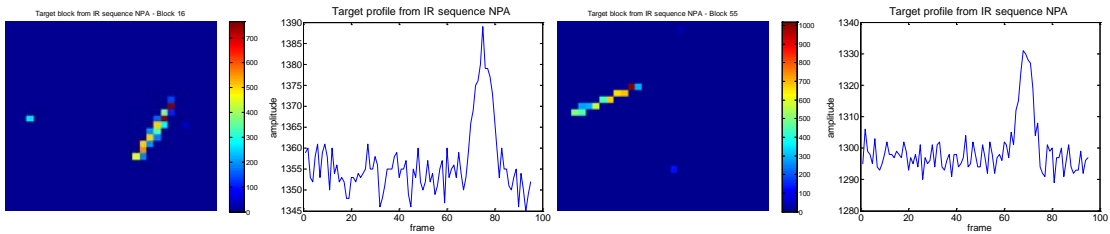

### b. Target block and profile from the IR sequence M21F

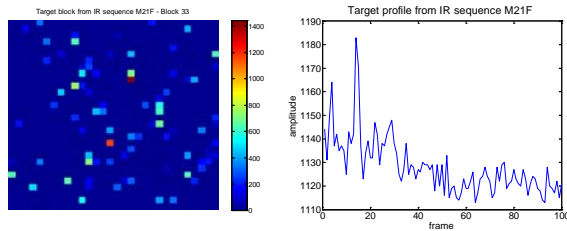

### c. Target block and profile from the IR sequence J13C

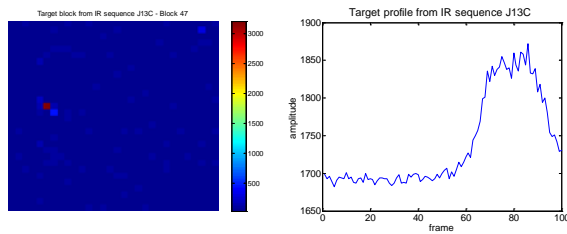

### d. Target blocks and profiles from the IR sequence J2A

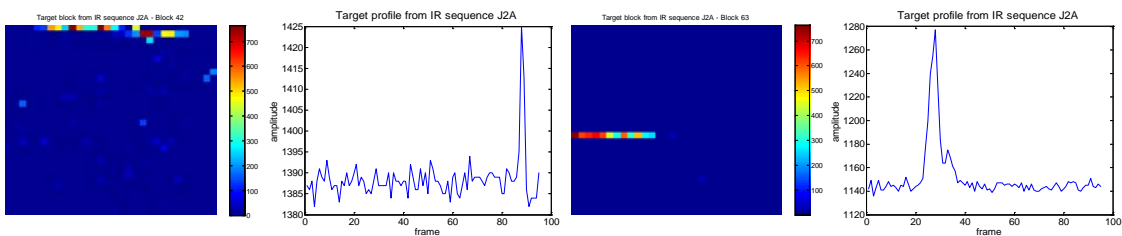

### e. Target block and profile from the IR sequence NA23

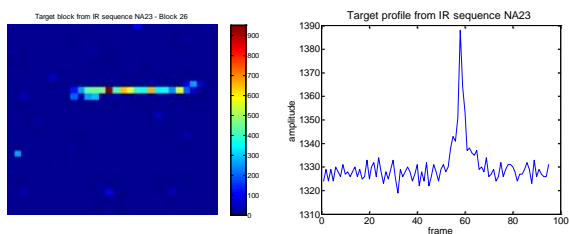

Supplement: 13634_2010_27_MOESM24_ESM.pdf [file 13634_2010_27_MOESM24_ESM.pdf]
