# Supplementary material for: Spatial and temporal point tracking in real hyperspectral images
Source: Springer Nature journal article supplement (doi:10.1186/1687-6180-2011-30), 2011-07-26
Supplement: 13634_2010_27_MOESM25_ESM.pdf [file 13634_2010_27_MOESM25_ESM.pdf]

Non Target Blocks

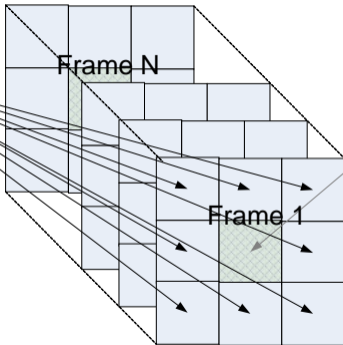

Target Block

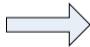

|                   |                   |                   |
|-------------------|-------------------|-------------------|
| Mean Block 30 SNR | Mean Block 37 SNR | Mean Block 44 SNR |
| Mean Block 31 SNR | Mean Block 38 SNR | Mean Block 45 SNR |
| Mean Block 32 SNR | Mean Block 39 SNR | Mean Block 46 SNR |

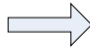

Test Score
