# Supplementary material for: Spatial and temporal point tracking in real hyperspectral images
Source: Springer Nature journal article supplement (doi:10.1186/1687-6180-2011-30), 2011-07-26

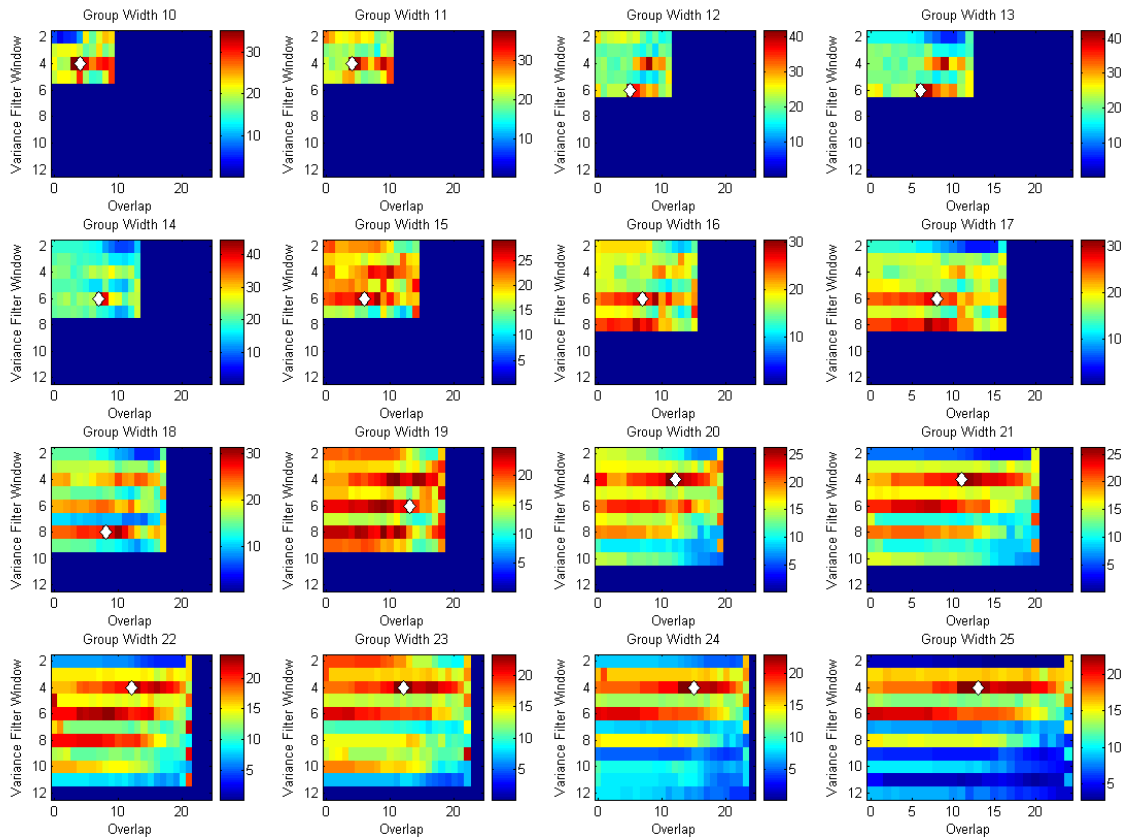

Supplement: 13634_2010_27_MOESM26_ESM.pdf [file 13634_2010_27_MOESM26_ESM.pdf]
